# Supplementary material for: Serum Paraoxonase-1-Related Variables and Lipoprotein Profile in Patients with Lung or Head and Neck Cancer: Effect of Radiotherapy
Source: MDPI journal article supplement (doi:10.3390/antiox8070213), 2019-07-10
Supplement: s1 [file s1]

**Supplementary Table 1.** Ratios between the concentration of cholesterol in high-density lipoproteins and the number of particles before and after radiotherapy

| Variable           | Before radiotherapy | After radiotherapy  | p-value |
|--------------------|---------------------|---------------------|---------|
| HDL-C/HDL-P large  | 163.9 (141.2-181.1) | 175.5 (145.6-198.9) | 0.168   |
| HDL-C/HDL-P medium | 4.6 (4.0-4.8)       | 4.8 (4.3-5.4)       | 0.312   |
| HDL-C/HDL-P small  | 3.3 (3.1-4.1)       | 3.4 (3.2-4.1)       | 0.470   |

HDL-C: Cholesterol concentration in high-density lipoproteins. HDL-P: Number of high-density lipoprotein particles (large, medium and small). Statistical comparisons were done with the Mann-Whitney *U*-test.

**Supplementary Table 2.** Multiple regression analyses of selected variables showing their significant and independent association or not with the presence or absence of cancer

| Model*                   | $\beta$ coefficient | Standard error | t      | p-value |
|--------------------------|---------------------|----------------|--------|---------|
| Constant                 | 2.696               | 0.185          | 14.559 | < 0.001 |
| Age                      | -0.018              | 0.002          | -7.854 | < 0.001 |
| Sex                      | 0.095               | 0.076          | 1.248  | 0.215   |
| Smoking                  | -0.091              | 0.043          | -2.098 | 0.038   |
| Alcohol intake           | -0.010              | 0.035          | -0.281 | 0.779   |
| Hypertension             | -0.030              | 0.060          | -0.498 | 0.620   |
| Type 2 diabetes mellitus | 0.031               | 0.058          | 0.527  | 0.600   |
| VLDL-cholesterol         | 0.015               | 0.010          | 1.476  | 0.143   |
| VLDL-triglycerides       | -0.005              | 0.003          | -1.762 | 0.081   |
| IDL-triglycerides        | -0.026              | 0.031          | -0.856 | 0.394   |
| LDL-triglycerides        | -0.003              | 0.014          | -2.225 | 0.822   |
| HDL-triglycerides        | 0.003               | 0.016          | 0.166  | 0.869   |

\*Model summary:  $r^2 = 0.674$ ;  $p < 0.001$ . HDL: high-density lipoprotein; IDL: intermediate-density lipoprotein; LDL: low-density lipoprotein; PON1: paraoxonase-1; VLDL: very-low-density lipoprotein.

**Supplementary Table 3.** Relationships between paraoxonase-1-related variables before radiotherapy and toxic reactions to radiation, clinical status, and response to treatment in patients with lung cancer

| Variable                                              | Before radiotherapy           |                    |                            |
|-------------------------------------------------------|-------------------------------|--------------------|----------------------------|
|                                                       | Paraoxonase-1 (mg/L)          | Arylesterase (U/L) | Specific activity (U/mg)   |
| <b>Epithelitis</b>                                    |                               |                    |                            |
| Yes (n=24)                                            | 50.1 (28.8-59.6)              | 93.8 (69.6-103.4)  | 1.5 (1.2-3.8)              |
| No (n=9)                                              | 32.8 (20.1-44.0) <sup>a</sup> | 97.3 (59.2-101.6)  | 2.4 (1.6-6.6)              |
| <b>Lung toxicity</b>                                  |                               |                    |                            |
| Yes (n=25)                                            | 49.7 (34.4-59.1)              | 93.4 (66.8-100.4)  | 1.6 (1.2-2.7)              |
| No (n=8)                                              | 20.9 (10.1-44.2) <sup>b</sup> | 101.6 (64.5-102.5) | 6.3 (1.6-10.1)             |
| <b>Treatment response</b>                             |                               |                    |                            |
| Complete response (n=11)                              | 25.4 (10.5-43.2)              | 101.0 (75.1-102.4) | 4.0 (1.6-9.8) <sup>f</sup> |
| Partial response (n=10)                               | 54.8 (47.3-61.4) <sup>d</sup> | 72.9 (59.4-94.4)   | 1.2 (0.8-1.7)              |
| Stabilization of disease (n=7)                        | 51.2 (34.5-60.2) <sup>c</sup> | 96.5 (75.1-103.8)  | 1.8 (1.5-3.3) <sup>e</sup> |
| Progression of disease (n=5)                          | 41.8 (29.3-98.6)              | 99.4 (71.4-121.8)  | 2.4 (0.9-3.7)              |
| <b>Clinical status</b>                                |                               |                    |                            |
| Disease free survival (n=4)                           | 27.8 (14.0-50.1)              | 100.1 (64.1-103.4) | 2.9 (1.7-8.3)              |
| Stabilization of disease (n=8)                        | 50.8 (40.5-56.2)              | 66.8 (49.3-91.0)   | 1.4 (0.9-1.8)              |
| Locoregional progression of disease (n=8)             | 48.4 (37.9-59.7)              | 79.9 (75.1-103.6)  | 1.5 (1.3-2.1)              |
| Distant recurrence of disease (n=5)                   | 32.8 (17.7-42.5)              | 99.4 (73.2-101.9)  | 3.0 (1.7-7.1)              |
| Locoregional and distant progression of disease (n=6) | 60.0 (23.7-76.7)              | 95.2 (84.0-118.8)  | 1.4 (0.8-4.7)              |
| Unknown (n=2)                                         | 33.8 (29.7)                   | 113.2 (102.5)      | 3.4 (3.3)                  |

The table only shows the clinical characteristics significantly associated with changes in PON1-related variables in at least one subgroup. Results are shown as medians and interquartile ranges (in parenthesis). <sup>a</sup> p < 0.05, <sup>b</sup> p < 0.01, with respect to Yes; <sup>c</sup> p < 0.05, <sup>d</sup> p < 0.01, with respect to complete response; <sup>e</sup> p < 0.05, <sup>f</sup> p < 0.01, with respect to partial response. Statistical comparisons were done with the Mann-Whitney *U*-test.

**Supplementary Table 4.** Relationships between paraoxonase-1-related variables after radiotherapy and toxic reactions to radiation, clinical status, and response to treatment in patients with lung cancer

| Variable                                              | After radiotherapy   |                               |                          |
|-------------------------------------------------------|----------------------|-------------------------------|--------------------------|
|                                                       | Paraoxonase-1 (mg/L) | Arylesterase (U/L)            | Specific activity (U/mg) |
| <b>Epithelitis</b>                                    |                      |                               |                          |
| Yes (n=17)                                            | 55.4 (47.1-71.4)     | 42.8 (30.1-61.9)              | 0.8 (0.4-1.0)            |
| No (n=5)                                              | 54.7 (48.7-62.0)     | 43.1 (33.3-57.3)              | 0.8 (0.5-1.1)            |
| <b>Lung toxicity</b>                                  |                      |                               |                          |
| Yes (n=16)                                            | 55.8 (46.1-69.7)     | 42.4 (29.3-48.7)              | 0.7 (0.4-1.0)            |
| No (n=6)                                              | 54.6 (48.7-61.3)     | 52.8 (38.2-80.7)              | 0.9 (0.7-1.5)            |
| <b>Treatment response</b>                             |                      |                               |                          |
| Complete response (n=7)                               | 54.5 (45.1-66.3)     | 50.5 (43.1-97.8)              | 0.9 (0.6-1.3)            |
| Partial response (n=8)                                | 68.8 (54.9-82.3)     | 42.4 (29.5-65.7)              | 0.7 (0.4-1.0)            |
| Stabilization of disease (n=5)                        | 52.9 (46.2-58.8)     | 31.7 (18.4-42.1) <sup>c</sup> | 0.7 (0.3-0.8)            |
| Progression of disease (n=2)                          | 49.8 (44.3)          | 55.1 (50.5)                   | 1.1 (0.9)                |
| <b>Clinical status</b>                                |                      |                               |                          |
| Disease free survival (n=3)                           | 61.5 (43.2)          | 31.7 (19.2)                   | 0.6 (0.3)                |
| Stabilization of disease (n=7)                        | 50.8 (40.5-56.2)     | 43.1 (42.8-73.3)              | 0.9 (0.8-1.0)            |
| Locoregional progression of disease (n=7)             | 57.8 (52.9-85.7)     | 42.0 (28.5-50.5)              | 0.8 (0.4-0.9)            |
| Distant recurrence of disease (n=3)                   | 44.3 (35.4)          | 97.8 (59.6) <sup>a</sup>      | 1.3 (1.3) <sup>a,b</sup> |
| Locoregional and distant progression of disease (n=2) | 52.3 (49.2)          | 25.1 (17.5)                   | 0.5 (0.4)                |

The table only shows the clinical characteristics significantly associated with changes in PON1-related variables in at least one subgroup. Results are shown as medians and interquartile ranges (in parenthesis). <sup>a</sup>  $p < 0.05$ , with respect to locoregional progression of disease; <sup>b</sup>  $p < 0.05$ , with respect to stabilization of disease. Statistical comparisons were done with the Mann-Whitney *U*-test.

**Supplementary Table 5.** Relationships between paraoxonase-1-related variables and the toxicity to radiotherapy, clinical status, and response to treatment in patients with head and neck cancer

|                       | <b>Before radiotherapy</b>     |                                 |
|-----------------------|--------------------------------|---------------------------------|
| <b>Variable</b>       | <b>Arylesterase (U/L)</b>      | <b>Specific activity (U/mg)</b> |
| <b>Clinical stage</b> |                                |                                 |
| I (n=5)               | 51.8 (32.9-95.0)               | 1.0 (0.6-2.4)                   |
| II (n=5)              | 99.2 (62.2-104.4) <sup>a</sup> | 3.4 (2.8-6.0)                   |
| III (n=5)             | 118.2 (111.4-120.2)            | 2.7 (1.1-4.6)                   |
| IV (n=13)             | 79.6 (64.9-90.0) <sup>a</sup>  | 2.1 (1.4-5.3)                   |
| <b>Tumor size</b>     |                                |                                 |
| T1 (n=4)              | 67.2 (42.1-101.8)              | 1.5 (0.8-3.0)                   |
| T2 (n=9)              | 101.5 (80.0-112.0)             | 3.1 (2.6-6.5) <sup>b</sup>      |
| T3 (n=7)              | 82.2 (63.9-119.7)              | 1.8 (1.1-3.9)                   |
| T4 (n=6)              | 84.3 (76.2-96.1)               | 2.2 (1.6-5.0)                   |
| Unknown (n=2)         | 41.9 (26.9)                    | 0.9 (0.6)                       |

The table only shows the clinical characteristics significantly associated with changes in PON1-related variables in at least one subgroup. Results are shown as medians and interquartile ranges (in parenthesis).

<sup>a</sup>  $p < 0.05$ , with respect to clinical stage III; <sup>b</sup>  $p < 0.05$ , with respect to T1. Statistical comparisons were done with the Mann-Whitney *U*-test.
